# Supplementary material for: Non-reciprocal Interspecies Hybridization Barriers in the Capsella Genus Are Established in the Endosperm
Source: PubMed Central journal article supplement (PMC4472357; doi:10.1371/journal.pgen.1005295), 2015-06-18
Supplement: pgen.1005295.s009.pdf [file pgen.1005295.s009.pdf]

**S4 Table.** *Capsella rubella* homologues of Type I AGLs in *Arabidopsis thaliana*. Type I AGLs in *Arabidopsis* were identified according to Bemer et al., 2010.

| <b><i>C. rubella</i> gene identifier</b> | <b><i>A. thaliana</i> gene identifier</b> | <b><i>A. thaliana</i> gene name</b> |
|------------------------------------------|-------------------------------------------|-------------------------------------|
| <i>Carubv10017771m.g</i>                 | AT5G26880                                 | AGL26                               |
| <i>Carubv10010156m.g</i>                 | AT1G01530                                 | AGL28                               |
| <i>Carubv10025656m.g</i>                 | AT2G34440                                 | AGL29                               |
| <i>Carubv10001920m.g</i>                 | AT5G26630                                 | AGL35                               |
| <i>Carubv10002555m.g</i>                 | AT5G26630                                 | AGL35                               |
| <i>Carubv10003757m.g</i>                 | AT5G26630                                 | AGL35                               |
| <i>Carubv10008056m.g</i>                 | AT5G26630                                 | AGL35                               |
| <i>Carubv10001166m.g</i>                 | AT5G26650                                 | AGL36                               |
| <i>Carubv10003161m.g</i>                 | AT5G26650                                 | AGL37                               |
| <i>Carubv10001714m.g</i>                 | AT1G65300                                 | AGL38, PHE2                         |
| <i>Carubv10020903m.g</i>                 | AT1G65300                                 | AGL38, PHE2                         |
| <i>Carubv10022335m.g</i>                 | AT1G65300                                 | AGL38, PHE2                         |
| <i>Carubv10001421m.g</i>                 | AT5G27130                                 | AGL39                               |
| <i>Carubv10007644m.g</i>                 | AT4G36590                                 | AGL40                               |
| <i>Carubv10015167m.g</i>                 | AT3G05860                                 | AGL45                               |
| <i>Carubv10024482m.g</i>                 | AT2G28700                                 | AGL46                               |
| <i>Carubv10024493m.g</i>                 | AT2G28700                                 | AGL46                               |
| <i>Carubv10024608m.g</i>                 | AT2G28700                                 | AGL46                               |
| <i>Carubv10025317m.g</i>                 | AT2G28700                                 | AGL46                               |
| <i>Carubv10027564m.g</i>                 | AT5G55690                                 | AGL47                               |
| <i>Carubv10006793m.g</i>                 | AT2G40210                                 | AGL48                               |
| <i>Carubv10022233m.g</i>                 | AT1G60040                                 | AGL49                               |
| <i>Carubv10015981m.g</i>                 | AT2G40210                                 | AGL49                               |
| <i>Carubv10016121m.g</i>                 | AT2G40210                                 | AGL50                               |
| <i>Carubv10024813m.g</i>                 | AT2G40210                                 | AGL51                               |
| <i>Carubv10025411m.g</i>                 | AT2G40210                                 | AGL52                               |
| <i>Carubv10003642m.g</i>                 | AT5G27070                                 | AGL53                               |
| <i>Carubv10021715m.g</i>                 | AT1G60920                                 | AGL55                               |
| <i>Carubv10021738m.g</i>                 | AT1G60920                                 | AGL56                               |
| <i>Carubv10016398m.g</i>                 | AT3G04100                                 | AGL57                               |
| <i>Carubv10021825m.g</i>                 | AT1G72350                                 | AGL60                               |
| <i>Carubv10024914m.g</i>                 | AT2G24840                                 | AGL61, DIA                          |
| <i>Carubv10028580m.g</i>                 | AT5G60440                                 | AGL62                               |
| <i>Carubv10002683m.g</i>                 | AT1G29962                                 | AGL64                               |
| <i>Carubv10002712m.g</i>                 | AT1G29962                                 | AGL64                               |
| <i>Carubv10002787m.g</i>                 | AT1G29962                                 | AGL64                               |
| <i>Carubv10010430m.g</i>                 | AT1G29962                                 | AGL64                               |
| <i>Carubv10010438m.g</i>                 | AT1G29962                                 | AGL64                               |

|                          |                  |                      |
|--------------------------|------------------|----------------------|
| <i>Carubv10010833m.g</i> | <i>AT1G29962</i> | <i>AGL64</i>         |
| <i>Carubv10011216m.g</i> | <i>AT1G29962</i> | <i>AGL64</i>         |
| <i>Carubv10012214m.g</i> | <i>AT1G29962</i> | <i>AGL64</i>         |
| <i>Carubv10012479m.g</i> | <i>AT1G29962</i> | <i>AGL64</i>         |
| <i>Carubv10021362m.g</i> | <i>AT1G29962</i> | <i>AGL64</i>         |
| <i>Carubv10021425m.g</i> | <i>AT1G29962</i> | <i>AGL64</i>         |
| <i>Carubv10021446m.g</i> | <i>AT1G29962</i> | <i>AGL64</i>         |
| <i>Carubv10021725m.g</i> | <i>AT1G29962</i> | <i>AGL64</i>         |
| <i>Carubv10021838m.g</i> | <i>AT1G29962</i> | <i>AGL64</i>         |
| <i>Carubv10022052m.g</i> | <i>AT1G29962</i> | <i>AGL64</i>         |
| <i>Carubv10022123m.g</i> | <i>AT1G29962</i> | <i>AGL64</i>         |
| <i>Carubv10022431m.g</i> | <i>AT1G29962</i> | <i>AGL64</i>         |
| <i>Carubv10028105m.g</i> | <i>AT5G38620</i> | <i>AGL73</i>         |
| <i>Carubv10019521m.g</i> | <i>AT1G48150</i> | <i>AGL74</i>         |
| <i>Carubv10006350m.g</i> | <i>AT5G41200</i> | <i>AGL75</i>         |
| <i>Carubv10006654m.g</i> | <i>AT5G41200</i> | <i>AGL75</i>         |
| <i>Carubv10007456m.g</i> | <i>AT5G41200</i> | <i>AGL75</i>         |
| <i>Carubv10007591m.g</i> | <i>AT5G41200</i> | <i>AGL75</i>         |
| <i>Carubv10015354m.g</i> | <i>AT5G41200</i> | <i>AGL75</i>         |
| <i>Carubv10028378m.g</i> | <i>AT5G65330</i> | <i>AGL78</i>         |
| <i>Carubv10014232m.g</i> | <i>AT5G48670</i> | <i>AGL80, FEM111</i> |
| <i>Carubv10028059m.g</i> | <i>AT5G48670</i> | <i>AGL80, FEM111</i> |
| <i>Carubv10027979m.g</i> | <i>AT5G58890</i> | <i>AGL82</i>         |
| <i>Carubv10021267m.g</i> | <i>AT1G54760</i> | <i>AGL85</i>         |
| <i>Carubv10011611m.g</i> | <i>AT1G31630</i> | <i>AGL86</i>         |
| <i>Carubv10021558m.g</i> | <i>AT1G54760</i> | <i>AGL86</i>         |
| <i>Carubv10006189m.g</i> | <i>AT1G22590</i> | <i>AGL87</i>         |
| <i>Carubv10011303m.g</i> | <i>AT1G22590</i> | <i>AGL87</i>         |
| <i>Carubv10021360m.g</i> | <i>AT1G22590</i> | <i>AGL87</i>         |
| <i>Carubv10021540m.g</i> | <i>AT1G22590</i> | <i>AGL87</i>         |
| <i>Carubv10021762m.g</i> | <i>AT1G22590</i> | <i>AGL87</i>         |
| <i>Carubv10022252m.g</i> | <i>AT1G22590</i> | <i>AGL87</i>         |
| <i>Carubv10001114m.g</i> | <i>AT5G27960</i> | <i>AGL90</i>         |
| <i>Carubv10014761m.g</i> | <i>AT3G66656</i> | <i>AGL91</i>         |
| <i>Carubv10003716m.g</i> | <i>AT5G26950</i> | <i>AGL93</i>         |
| <i>Carubv10015395m.g</i> | <i>AT2G15660</i> | <i>AGL95</i>         |
| <i>Carubv10002761m.g</i> | <i>AT5G06500</i> | <i>AGL96</i>         |
| <i>Carubv10002823m.g</i> | <i>AT5G06500</i> | <i>AGL96</i>         |
| <i>Carubv10022197m.g</i> | <i>AT1G46408</i> | <i>AGL97</i>         |
| <i>Carubv10021917m.g</i> | <i>AT5G04640</i> | <i>AGL99</i>         |
| <i>Carubv10025699m.g</i> | <i>AT5G04640</i> | <i>AGL99</i>         |
| <i>Carubv10011075m.g</i> | <i>AT1G17310</i> | <i>AGL100</i>        |
| <i>Carubv10011345m.g</i> | <i>AT1G47760</i> | <i>AGL102</i>        |

|                          |                  |               |
|--------------------------|------------------|---------------|
| <i>Carubv10011458m.g</i> | <i>AT1G47760</i> | <i>AGL102</i> |
| <i>Carubv10012009m.g</i> | <i>AT1G47760</i> | <i>AGL102</i> |
| <i>Carubv10012603m.g</i> | <i>AT1G47760</i> | <i>AGL102</i> |
| <i>Carubv10024968m.g</i> | <i>AT1G47760</i> | <i>AGL102</i> |
| <i>Carubv10015986m.g</i> | <i>AT3G18650</i> | <i>AGL103</i> |

---
