# Supplementary material for: Non-reciprocal Interspecies Hybridization Barriers in the Capsella Genus Are Established in the Endosperm
Source: PubMed Central journal article supplement (PMC4472357; doi:10.1371/journal.pgen.1005295), 2015-06-18
Supplement: pgen.1005295.s010.pdf [file pgen.1005295.s010.pdf]

**S5 Table.** Genetic models predicting segregation of hybrid incompatibility in crosses of *C. rubella* × F2 plants (derived after selfing of an F1 plant *C. grandiflora* × *C. rubella*). The first model is based on a negative genetic interaction of one *C. rubella* maternal locus with two *C. grandiflora* paternal loci, while the second model is based on a negative genetic interaction of one *C. rubella* maternal locus with three *C. grandiflora* paternal loci. Paternal loci are written A, B and C if inherited from *C. grandiflora* and a, b, c if inherited from *C. rubella*. \*F2 survival rate depends on the presence of the *C. rubella* maternal locus, which for simplicity has not been indicated.

| <b>2 paternal <i>C. grandiflora</i> loci interacting with 1 <i>C. rubella</i> maternal locus</b> |                                     |                          |                                   |                                           |                                                                    |                                                      |
|--------------------------------------------------------------------------------------------------|-------------------------------------|--------------------------|-----------------------------------|-------------------------------------------|--------------------------------------------------------------------|------------------------------------------------------|
| <b>Genotype</b>                                                                                  | <b>Frequency of genotypes in F2</b> | <b>F2 survival rate*</b> | <b>Proportion of surviving F2</b> | <b>Relative frequency of surviving F2</b> | <b>Expected seed abortion rate in cross <i>C. rubella</i> × F2</b> | <b>Frequency of F2s giving rise to seed abortion</b> |
| AABB                                                                                             | 6.30%                               | 50% survive              | 3.2%                              | 3.6%                                      | 100%                                                               | 3.6%                                                 |
| AAbB                                                                                             | 12.50%                              | 75% survive              | 9.4%                              | 10.7%                                     | 50%                                                                | 21.4%                                                |
| aABB                                                                                             | 12.50%                              | 75% survive              | 9.4%                              | 10.7%                                     | 50%                                                                |                                                      |
| aAbB                                                                                             | 25%                                 | 87.5% survive            | 21.9%                             | 25.0%                                     | 25%                                                                | 25.0%                                                |
| AAbb                                                                                             | 6.30%                               | 100% survive             | 6.3%                              | 7.2%                                      | 0%                                                                 |                                                      |
| aAbb                                                                                             | 12.50%                              | 100% survive             | 12.5%                             | 14.3%                                     | 0%                                                                 |                                                      |
| aaBB                                                                                             | 6.30%                               | 100% survive             | 6.3%                              | 7.2%                                      | 0%                                                                 | 50.1%                                                |
| aabB                                                                                             | 12.50%                              | 100% survive             | 12.5%                             | 14.3%                                     | 0%                                                                 |                                                      |
| aabb                                                                                             | 6.30%                               | 100% survive             | 6.3%                              | 7.2%                                      | 0%                                                                 |                                                      |
|                                                                                                  |                                     | <b>Total</b>             | <b>87.7%</b>                      | <b>100.0%</b>                             |                                                                    |                                                      |

| <b>3 paternal <i>C. grandiflora</i> loci interacting with 1 <i>C. rubella</i> maternal locus</b> |                                     |                          |                                   |                                           |                                                                    |                                                      |
|--------------------------------------------------------------------------------------------------|-------------------------------------|--------------------------|-----------------------------------|-------------------------------------------|--------------------------------------------------------------------|------------------------------------------------------|
| <b>Genotype</b>                                                                                  | <b>Frequency of genotypes in F2</b> | <b>F2 survival rate*</b> | <b>Proportion of surviving F2</b> | <b>Relative frequency of surviving F2</b> | <b>Expected seed abortion rate in cross <i>C. rubella</i> × F2</b> | <b>Frequency of F2s giving rise to seed abortion</b> |
| AABBCC                                                                                           | 1.60%                               | 50% survive              | 0.8%                              | 0.9%                                      | 100%                                                               | 0.9%                                                 |
| AABBcC                                                                                           | 3.10%                               | 75% survive              | 2.3%                              | 2.5%                                      | 50%                                                                |                                                      |
| AAbBCC                                                                                           | 3.10%                               | 75% survive              | 2.3%                              | 2.5%                                      | 50%                                                                | 7.4%                                                 |
| aABBCC                                                                                           | 3.10%                               | 75% survive              | 2.3%                              | 2.5%                                      | 50%                                                                |                                                      |

|        |        |                |              |               |       |       |
|--------|--------|----------------|--------------|---------------|-------|-------|
| AAbBcC | 6.30%  | 87.5% survive  | 5.5%         | 5.9%          | 25%   |       |
| aABBcC | 6.30%  | 87.5% survive  | 5.5%         | 5.9%          | 25%   | 17.6% |
| aAbBCC | 6.30%  | 87.5% survive  | 5.5%         | 5.9%          | 25%   |       |
| aAbBcC | 12.50% | 93.75% survive | 11.7%        | 12.5%         | 12.5% | 12.5% |
| AABBcc | 1.60%  | 100% survive   | 1.6%         | 1.7%          | 0%    |       |
| AAbBcc | 3.10%  | 100% survive   | 3.1%         | 3.3%          | 0%    |       |
| aABBcc | 3.10%  | 100% survive   | 3.1%         | 3.3%          | 0%    |       |
| aAbBcc | 6.30%  | 100% survive   | 6.3%         | 6.7%          | 0%    |       |
| AAbbCC | 1.60%  | 100% survive   | 1.6%         | 1.7%          | 0%    |       |
| AAbbcC | 3.10%  | 100% survive   | 3.1%         | 3.3%          | 0%    |       |
| aAbbCC | 3.10%  | 100% survive   | 3.1%         | 3.3%          | 0%    |       |
| aAbbcC | 6.30%  | 100% survive   | 6.3%         | 6.7%          | 0%    |       |
| AAbbcc | 1.60%  | 100% survive   | 1.6%         | 1.7%          | 0%    |       |
| aAbbcc | 3.10%  | 100% survive   | 3.1%         | 3.3%          | 0%    | 61.7% |
| aaBBCC | 1.60%  | 100% survive   | 1.6%         | 1.7%          | 0%    |       |
| aaBBcC | 3.10%  | 100% survive   | 3.1%         | 3.3%          | 0%    |       |
| aabBCC | 3.10%  | 100% survive   | 3.1%         | 3.3%          | 0%    |       |
| aabBcC | 6.30%  | 100% survive   | 6.3%         | 6.7%          | 0%    |       |
| aaBBcc | 1.60%  | 100% survive   | 1.6%         | 1.7%          | 0%    |       |
| aabBcc | 3.10%  | 100% survive   | 3.1%         | 3.3%          | 0%    |       |
| aabbCC | 1.60%  | 100% survive   | 1.6%         | 1.7%          | 0%    |       |
| aabbcC | 3.10%  | 100% survive   | 3.1%         | 3.3%          | 0%    |       |
| aabbcc | 1.60%  | 100% survive   | 1.6%         | 1.7%          | 0%    |       |
|        |        | <b>Total</b>   | <b>94.0%</b> | <b>100.0%</b> |       |       |

---
