# Supplementary material for: Non-reciprocal Interspecies Hybridization Barriers in the Capsella Genus Are Established in the Endosperm
Source: PubMed Central journal article supplement (PMC4472357; doi:10.1371/journal.pgen.1005295), 2015-06-18
Supplement: pgen.1005295.s011.pdf [file pgen.1005295.s011.pdf]

**S6 Table.** Primer sequences used for qPCR.

| <b>Primer</b> | <b>Forward</b>                | <b>Reverse</b>                 |
|---------------|-------------------------------|--------------------------------|
| <i>PP2A</i>   | 5'- AA ACTCTTGCCTGCGGTTAT -3' | 5'- AGGTTCACTGCGAGCTTCCTCA -3' |
| <i>PHE1</i>   | 5'-CATCAAGAGAAGGGGCTGAG-3'    | 5'- GCGATCCTCTCACACAACA-3'     |
| <i>AGL36</i>  | 5'- ATGTGGGATATGCTGGAGGA -3'  | 5'- GAAAGGCATGTGATTGGTGAT -3'  |
| <i>AGL28</i>  | 5'- TGCTTCAGAACCAGTCAACG -3'  | 5'- CATTGAATCCAAACGGGAGA -3'   |
| <i>AGL61</i>  | 5'- TGGGAAAAGCCAGTAGAGG -3'   | 5'- GGAGCCATATTTGCCACAAC -3'   |
| <i>AGL62</i>  | 5'- ATGGACGATGGGAGTCGTAT-3'   | 5'- CAAACGGCAATGCATGACTA-3'    |
| <i>ADM</i>    | 5'- TTGGAGACATCATTGGCAAC-3'   | 5'- TCATCGCTTTGACTGTCACC-3'    |
