# Supplementary material for: Non-reciprocal Interspecies Hybridization Barriers in the Capsella Genus Are Established in the Endosperm
Source: PubMed Central journal article supplement (PMC4472357; doi:10.1371/journal.pgen.1005295), 2015-06-18
Supplement: pgen.1005295.s012.pdf [file pgen.1005295.s012.pdf]

**S7 Table.** Quality of sequencing samples. Replicates are biological replicates. *Cr*, *Capsella rubella*, *Cg* *Capsella grandiflora*.

| Library                    | Mapped Reads | Average Coverage | Average Reads per Gene | Mapping Efficiency |
|----------------------------|--------------|------------------|------------------------|--------------------|
| <i>Cr</i> × <i>Cr</i> Rep1 | 69,225,933   | 45.04            | 1282                   | 96%                |
| <i>Cr</i> × <i>Cr</i> Rep2 | 51,777,128   | 34.81            | 937                    | 89%                |
| <i>Cr</i> × <i>Cg</i> Rep1 | 69,802,639   | 44.64            | 1292                   | 95%                |
| <i>Cr</i> × <i>Cg</i> Rep2 | 53,293,936   | 33.69            | 936                    | 88%                |
| <i>Cg</i> × <i>Cg</i> Rep1 | 61,373,924   | 38.65            | 1131                   | 96%                |
| <i>Cg</i> × <i>Cg</i> Rep2 | 56,617,904   | 36.05            | 1026                   | 89%                |
| <i>Cg</i> × <i>Cr</i> Rep1 | 61,471,676   | 41.45            | 1111                   | 87%                |
| <i>Cg</i> × <i>Cr</i> Rep2 | 54,225,770   | 35.24            | 970                    | 91%                |
